# Supplementary material
Source: PubMed Central journal article supplement (PMC3985963)
Supplement: bi401240x_si_001.pdf [file bi401240x_si_001.pdf]

## **Supplementary Information**

### **Structure of Human PIR1, an Atypical Dual Specificity Phosphatase**

*Rajeshwer Singh Sankhala, Ravi Kumar Lokareddy and Gino Cingolani \**

Department of Biochemistry and Molecular Biology, Thomas Jefferson University,

233 South 10<sup>th</sup> Street, Philadelphia, Pennsylvania 19107

**Figure S1. The far UV circular dichroism spectrum of PIR1-C152S-core<sup>FED</sup> recorded from a 6  $\mu$ M sample of purified protein dissolved in 20 mM sodium phosphate buffer pH 8 and 170 mM NaCl.**

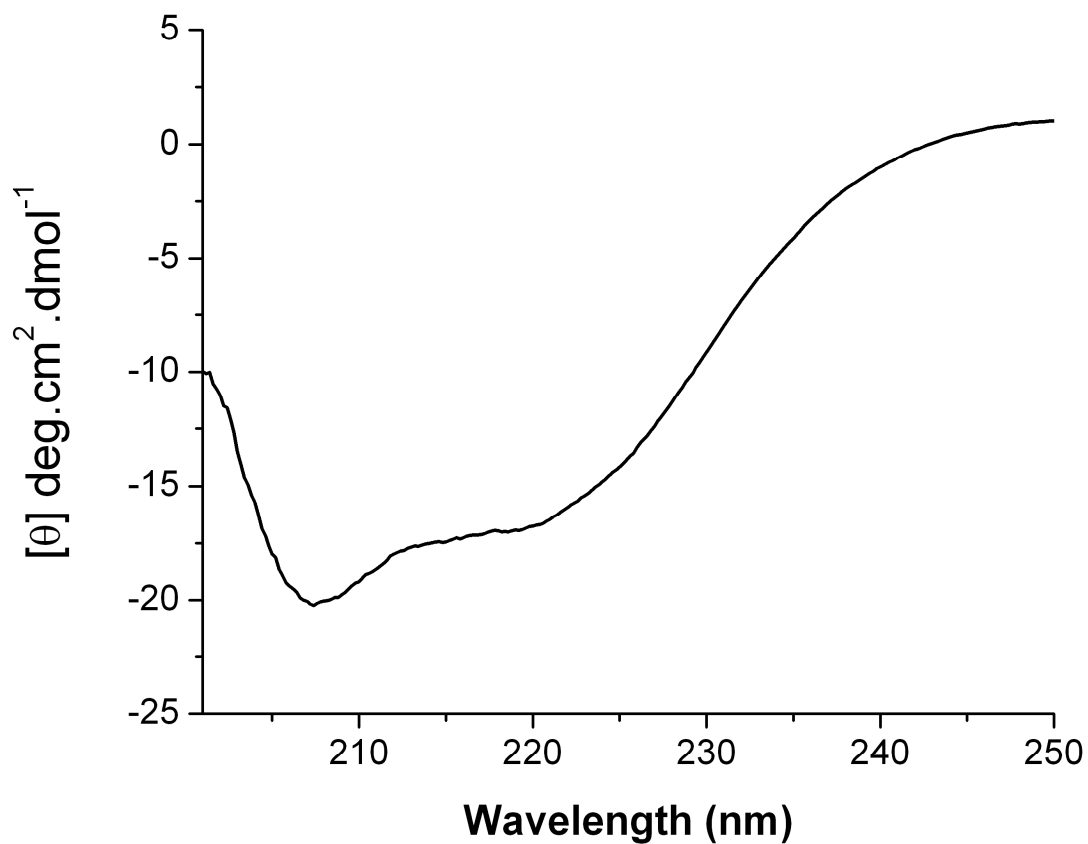

Figure S2. Thermal denaturation of PIR1-C152S-core monitored by measuring temperature-induced CD changes in ellipticity at 222 nm. PIR1-C152S-core unfolded irreversibly with  $appT_m \sim 57.2$  °C.

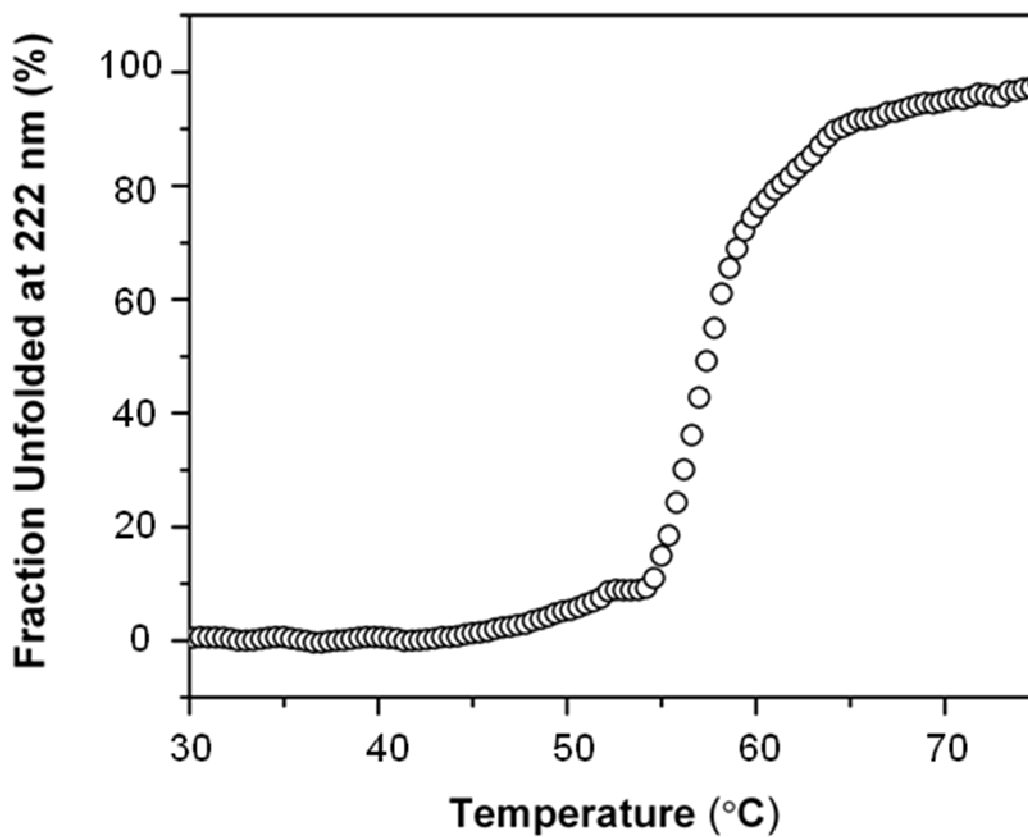

**Figure S3.** Superimposition of the cubic (gray) and orthorhombic (red) crystal structures of PIR1-C152S-core solved at 1.85Å and 1.20Å resolution, respectively. The rmsd between the two structures is ~0.32 Å. The ribbon diagrams were prepared using the program Pymol (Delano Scientific).

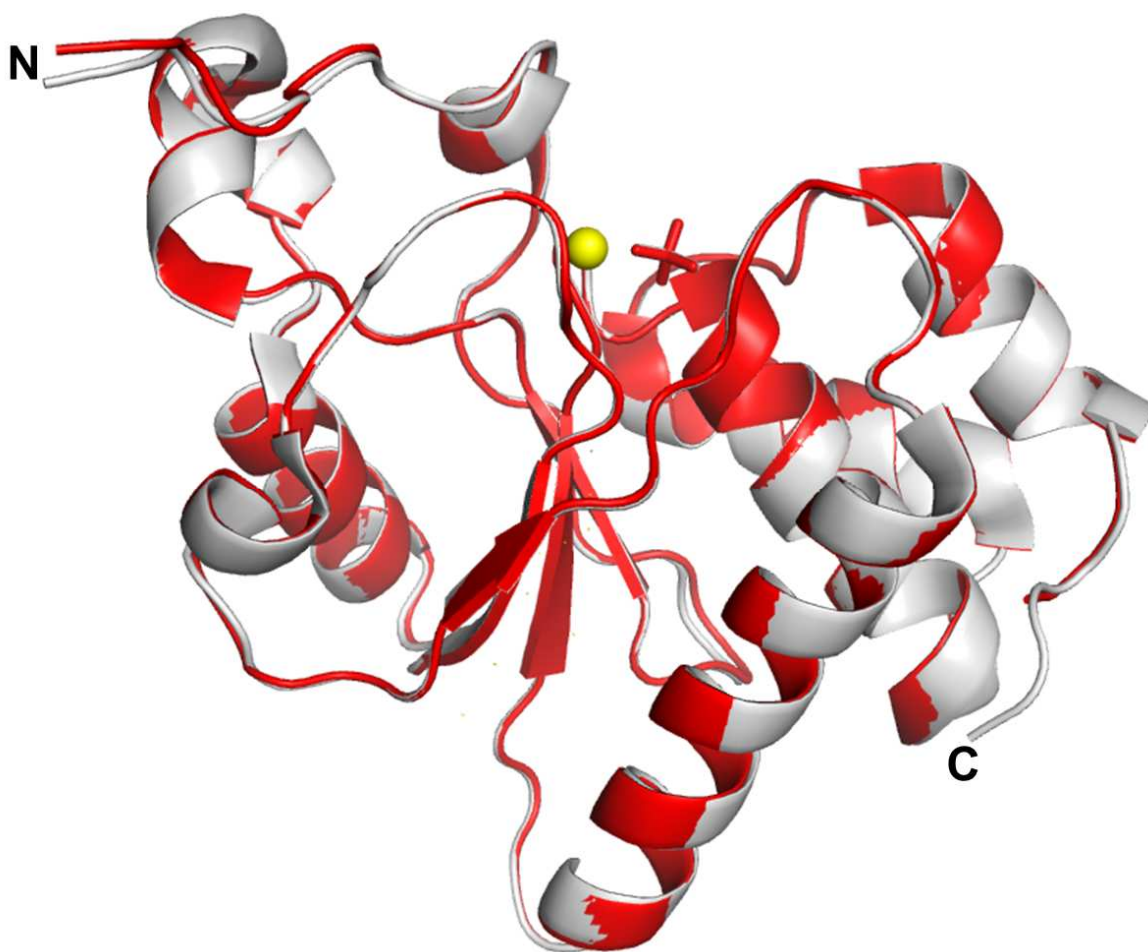

**Figure S4. Active site ions visualized in the 2.20 Å crystal structure of PIR1-C152C-core<sup>FED</sup> crystallized in the presence of ~35mM NaCl.** In yellow is an unbiased Fo-Fc difference map contoured at  $8\sigma$  above background and overlaid to a 2Fo-Fc map (cyan) displayed at  $1.5\sigma$ . The structure was refined to a Rwork/free of 20.2/25.4% at 2.20 Å resolution. The density was calculated and is displayed using the program Coot (1).

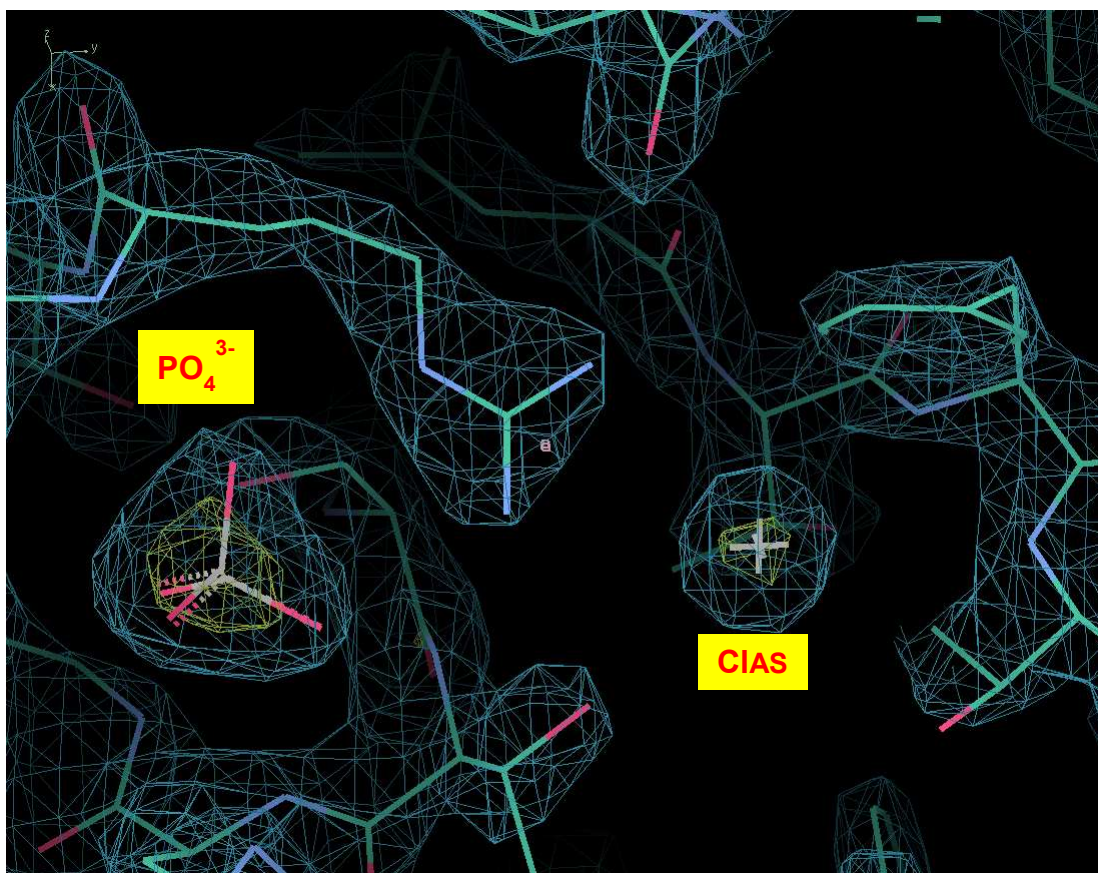

## REFERENCES

1. Emsley, P., and Cowtan, K. (2004) Coot: model-building tools for molecular graphics, *Acta Crystallogr D Biol Crystallogr* 60, 2126-2132.
